# Supplementary material for: Report on a visis to the Faculty of Agronomy, Eduardo Mondlane University, Maputo, Mozambique
Source: Royal Society of Chemistry journal article supplement (doi:10.1039/c9ra08278f), 1983-01-01
Supplement: c9ra08278f1.pdf [file c9ra08278f1.pdf]

## Supporting Information

### **High Efficiency Dye-sensitized Solar Cells with $V_{OC}$ - $J_{SC}$ Trade off Eradication by Interfacial Engineering of Photoanode|electrolyte Interface**

Anantharaj Gopalraman <sup>a,b\*</sup>, Subbian karuppuchamy <sup>c</sup>, Saranyan Vijayaraghavan <sup>a,b\*</sup>

<sup>a</sup> Corrosion and Materials Protection Division, CSIR-Central Electrochemical Research Institute,  
Karaikudi, Tamil Nadu, India, 630003.

<sup>b</sup> Academy of Scientific and Innovative Research

<sup>c</sup> Department of Energy Science, Alagappa University, Karaikudi, Tamilnadu, India, 630003.

\*Corresponding Author: E-mail: [anantharaj.che@gmail.com](mailto:anantharaj.che@gmail.com), [saranyan@cecri.res.in](mailto:saranyan@cecri.res.in).

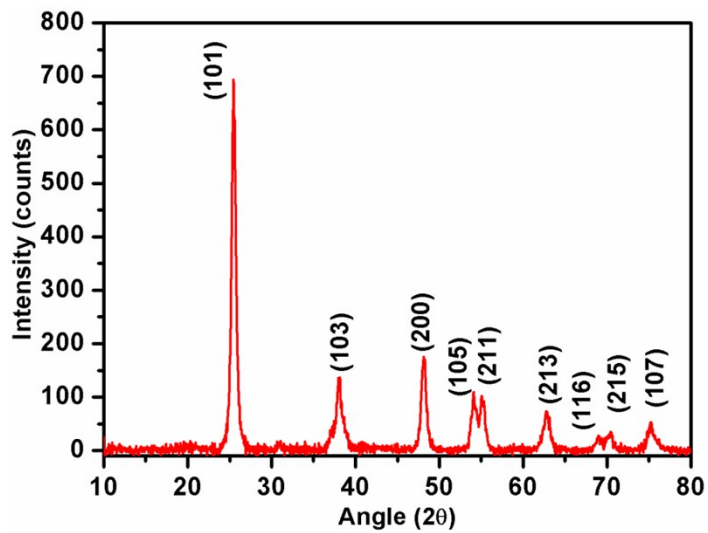

**Fig. S1.** XRD pattern of TiO<sub>2</sub> nanoparticles. The peaks are well matched with the standard ICDD reference pattern (00-001-0562)

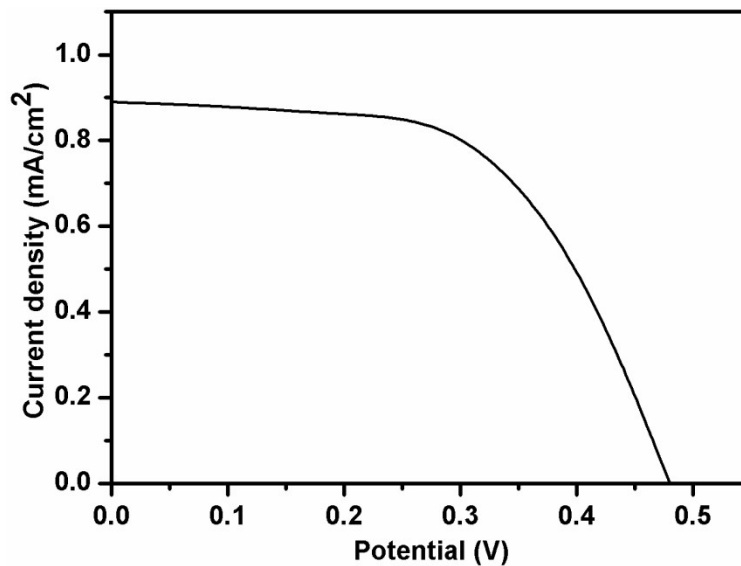

**Fig. S2.** J-V characteristics of DSSC sensitized OA alone under the illumination of 100 mW/cm<sup>2</sup>.

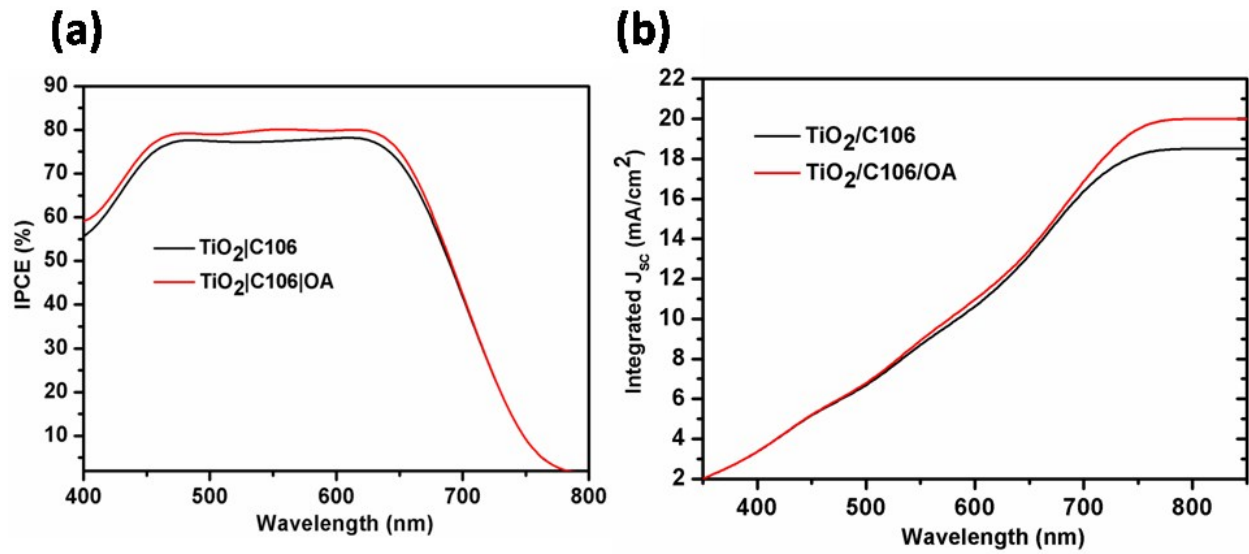

**Fig. S3.** IPCE spectrum of DSSCs as a function of wavelength for the standard device and OA modified device (a) and the integrated current density spectra.

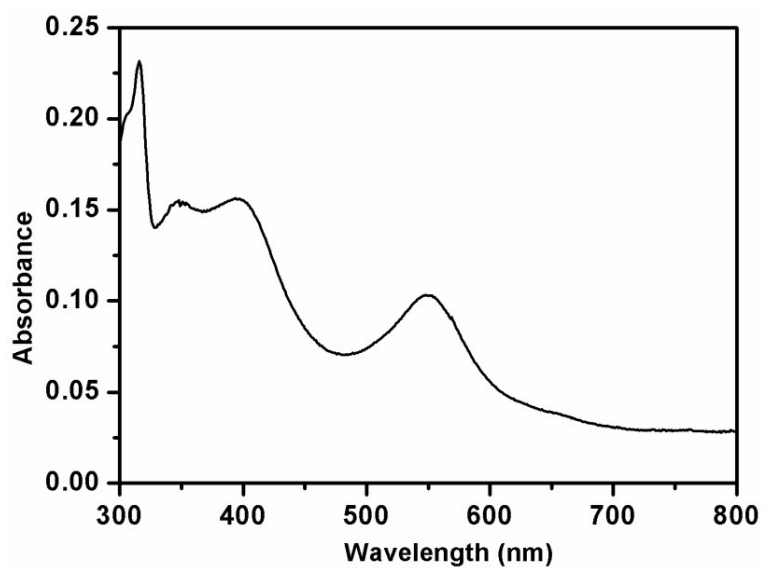

Fig. S4. UV-Vis spectrum of C 106 dye solution in DMF.

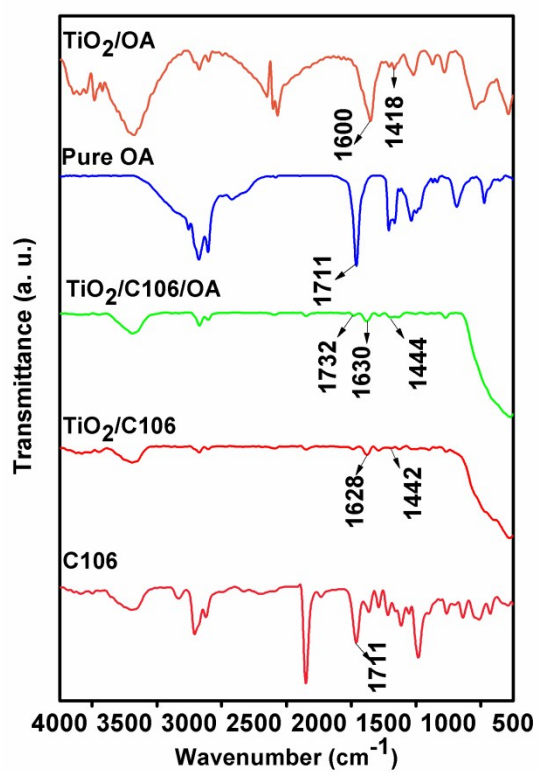

Fig. S5. FT-IR spectra of C106, TiO<sub>2</sub>/C106, TiO<sub>2</sub>/C106/OA, OA and TiO<sub>2</sub>/OA.

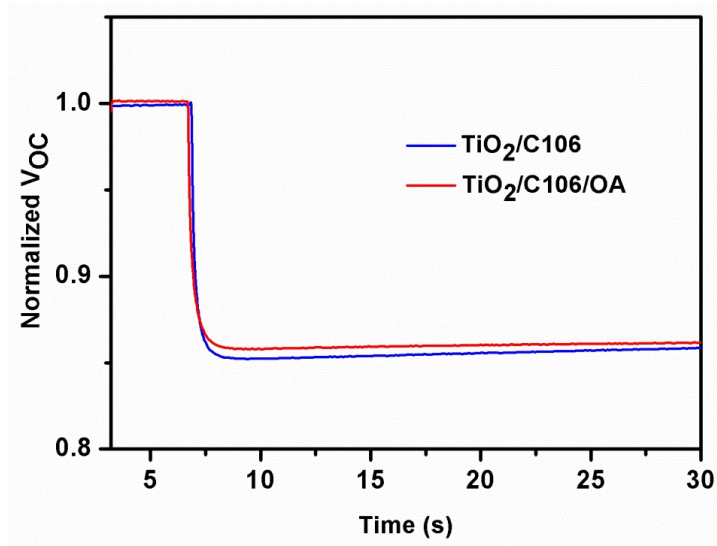

**Fig. S6.**  $V_{OC}$  decay profile of DSSCs

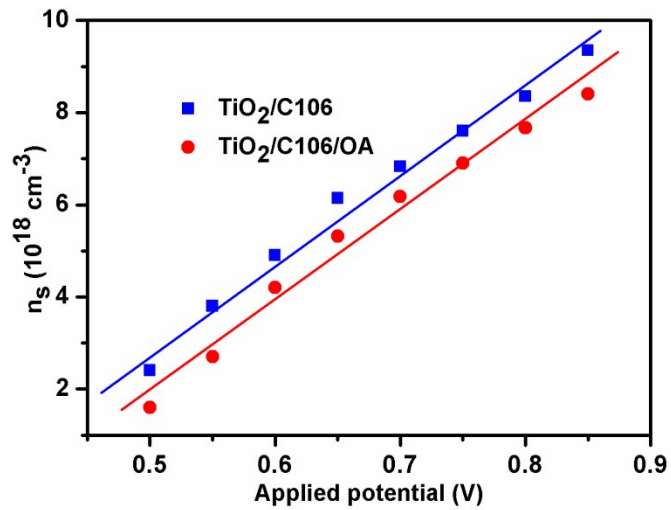

**Fig. S7.** Variation steady state electron density as a function of applied potentials under dark condition.

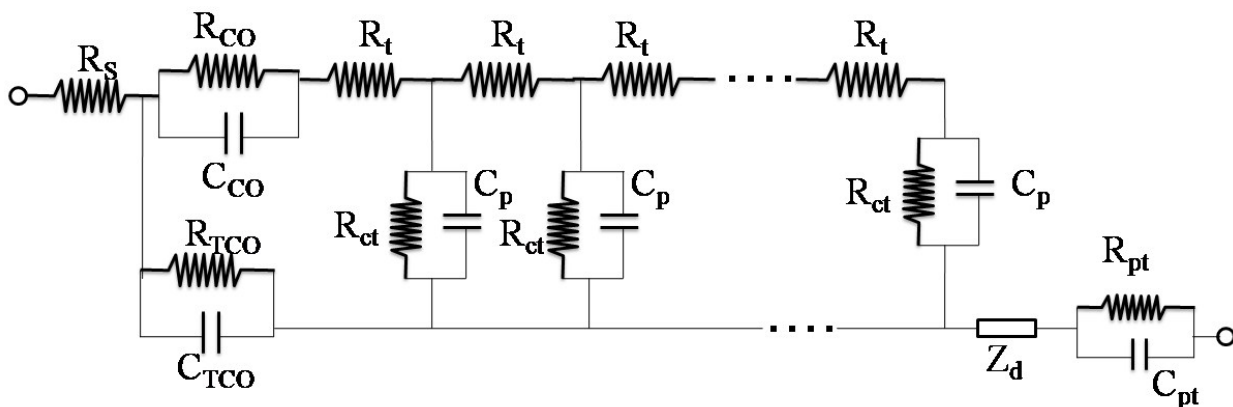

**Scheme. S1.** Equivalent circuit (Transmission line model) used for fitting the impedance data.  $R_s$ -total series resistance,  $R_{pt}$ ,  $R_{ct}$ ,  $R_t$  and  $C_p$  are the charge transfer resistance at platinum/electrolyte interface, recombination resistance at the photoanode/electrolyte interface, electron transport resistance in  $TiO_2$  network and chemical capacitance at the photoanode/electrolyte interface, respectively.  $Z_d$  is the Warburg diffusion element.
